# Supplementary material for: Neuronal Na+ Channels Are Integral Components of Pro-Arrhythmic Na+/Ca2+ Signaling Nanodomain That Promotes Cardiac Arrhythmias During β-Adrenergic Stimulation
Source: PubMed Central journal article supplement — JACC Basic Transl Sci. 2016 May 25;1(4):251–66. doi: 10.1016/j.jacbts.2016.04.004 (PMC5065245; doi:10.1016/j.jacbts.2016.04.004), 2016-05-25
Supplement: NIHMS789353-supplement-01.pdf [file NIHMS789353-supplement-01.pdf]

# Supplemental Figure 1

IF: Cx43 - Na<sub>v</sub>1.5

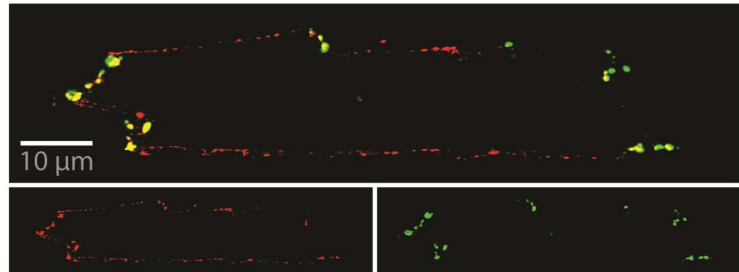

DL: Cx43 - Na<sub>v</sub>1.5

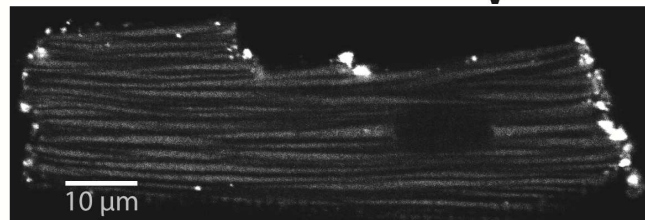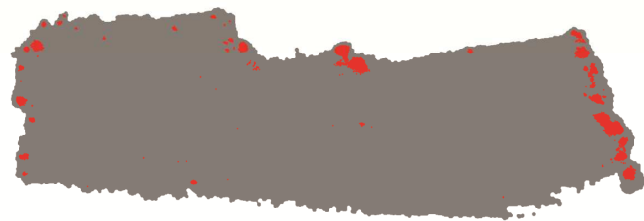

## Supplemental Figure 2

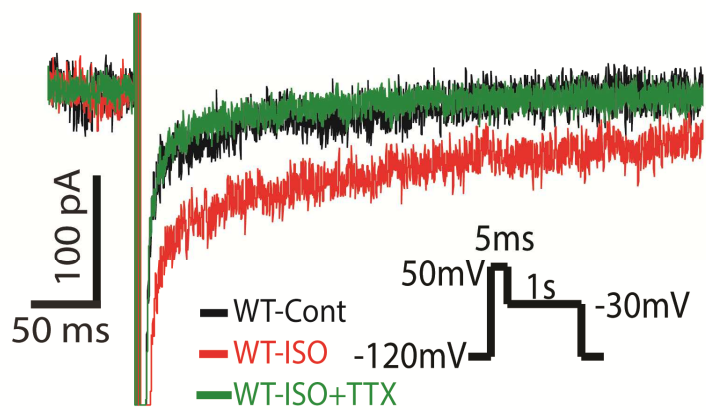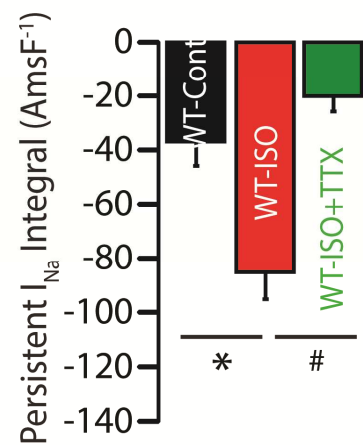

# Supplemental Figure 3

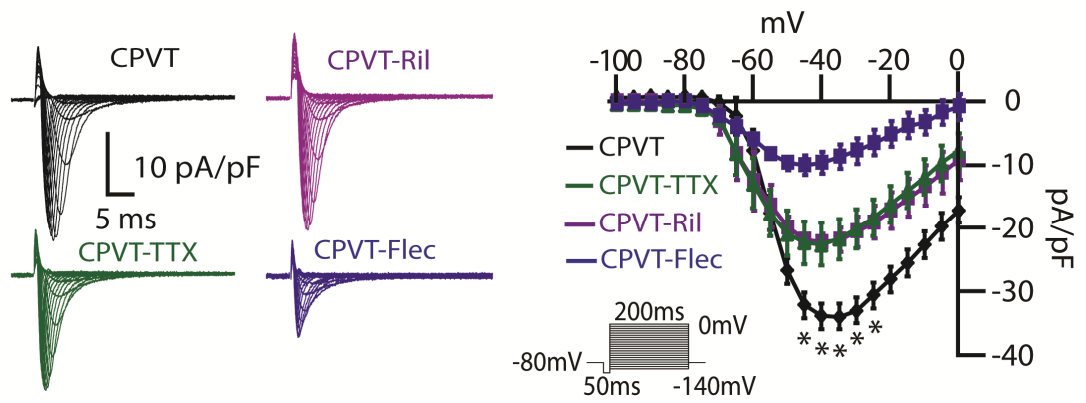

# Supplemental Figure 4

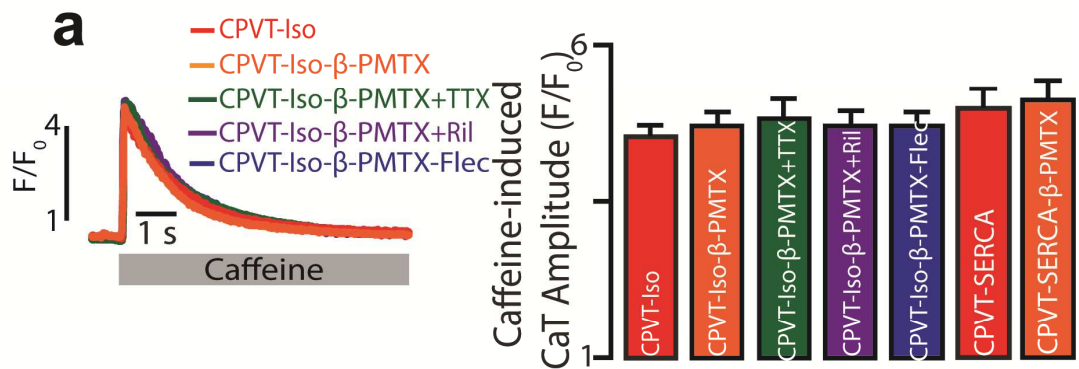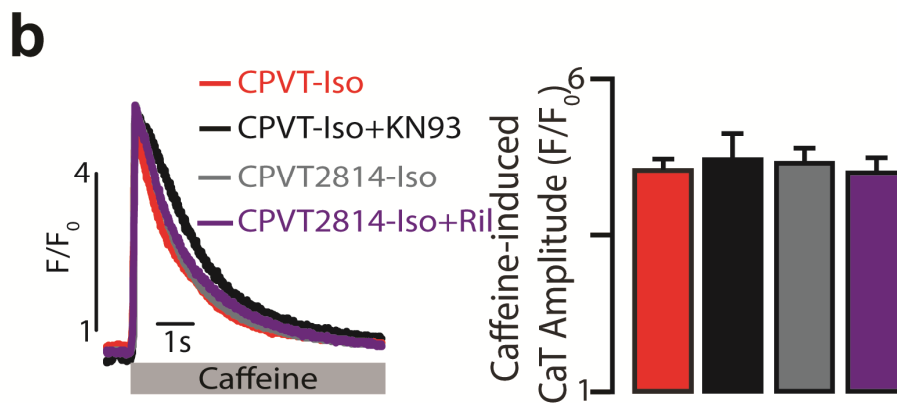

# Supplemental Figure 5

**a**

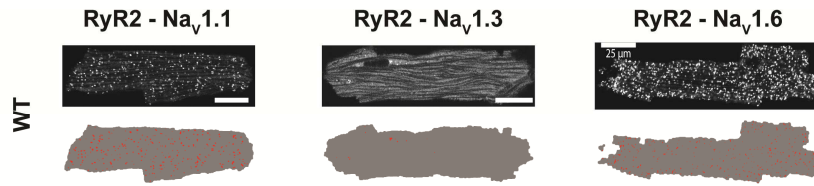

**b**

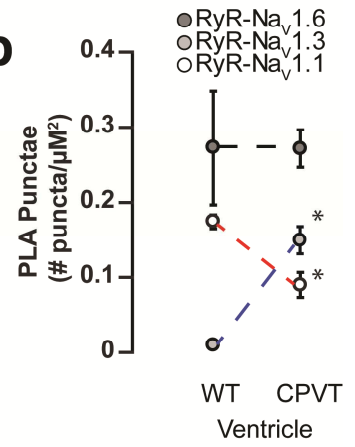

# Supplemental Figure 6

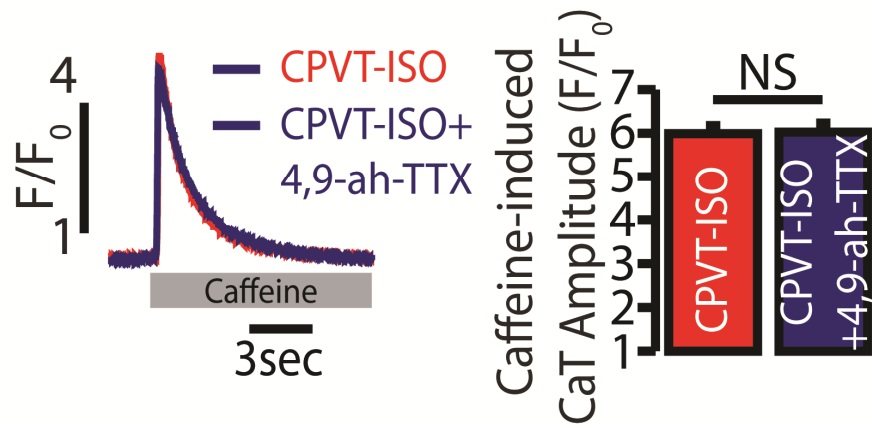

# Supplemental Figure 7

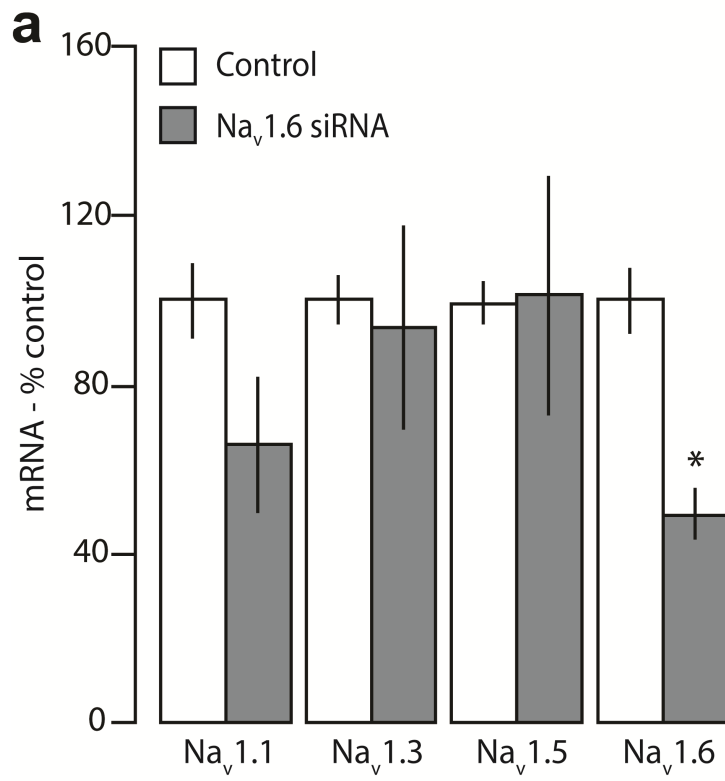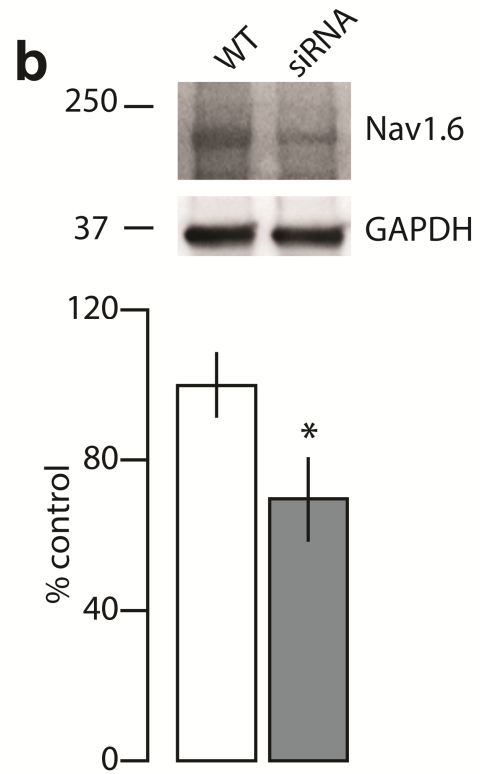

# Supplemental Figure 8

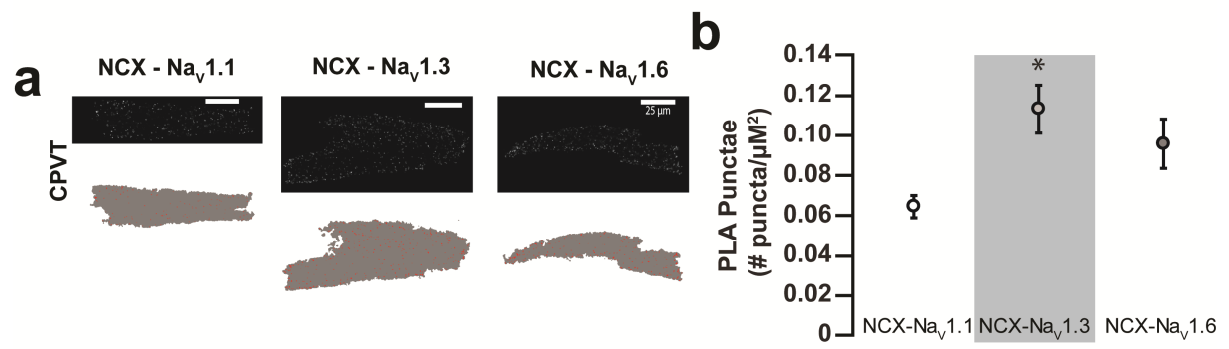



Although triggered arrhythmias including catecholaminergic polymorphic ventricular tachycardia (CPVT) are often caused by increased levels of circulating catecholamines, the mechanistic link between  $\beta$ -adrenergic receptor (AR) stimulation and the subcellular/molecular arrhythmogenic trigger(s) is unclear. Here, we systematically investigated the subcellular and molecular consequences of  $\beta$ -AR stimulation in the promotion of catecholamine-induced cardiac arrhythmias. Using mouse models of cardiac calsequestrin-associated CPVT, we demonstrate that a subpopulation of  $\text{Na}^+$  channels, mainly the neuronal  $\text{Na}^+$  channels  $\text{nNa}_v$ , colocalize with RyR2 and  $\text{Na}^+/\text{Ca}^{2+}$  exchanger (NCX) are a part of the  $\beta$ -AR-mediated arrhythmogenic process. Specifically, augmented  $\text{Na}^+$  entry via  $\text{nNa}_v$  in the settings of genetic defects within the RyR2 complex and enhanced sarcoplasmic reticulum (SR)  $\text{Ca}^{2+}$ -ATPase (SERCA)-mediated SR  $\text{Ca}^{2+}$  refill is both an essential and a necessary factor for the arrhythmogenesis. Furthermore, we show that augmentation of  $\text{Na}^+$  entry involves  $\beta$ -AR-mediated activation of CAMKII subsequently leading to  $\text{nNa}_v$  augmentation. Importantly, selective pharmacological inhibition as well as silencing of  $\text{Na}_v1.6$  inhibit myocyte arrhythmic potential and prevent arrhythmias *in vivo*. Taken together, these data suggest that the arrhythmogenic alteration in  $\text{Na}^+/\text{Ca}^{2+}$  handling evidenced during  $\beta$ -AR stimulation results, at least in part, from enhanced  $\text{Na}^+$  influx through  $\text{nNa}_v$ . Therefore, selective inhibition of these channels and  $\text{Na}_v1.6$  in particular can serve as a potential antiarrhythmic therapy.

- Catecholaminergic polymorphic ventricular tachycardia (CPVT) is often caused by increased levels of circulating catecholamines; however, the mechanistic link between  $\beta$ -adrenergic receptor (AR) stimulation and the subcellular/molecular arrhythmogenic trigger(s) is unclear.
- In both CPVT and wild type mice, a subpopulation of  $\text{Na}^+$  channels (neuronal  $\text{Na}^+$  channels;  $\text{nNa}_v$ ) colocalize with RyR2 and  $\text{Na}^+/\text{Ca}^{2+}$  exchanger (NCX).
- Augmented  $\text{Na}^+$  entry via  $\text{nNa}_v$  and enhanced sarcoplasmic reticulum (SR)  $\text{Ca}^{2+}$ -ATPase (SERCA)-mediated SR  $\text{Ca}^{2+}$  refill are both essential and necessary for CPVT.
- Augmentation of  $\text{Na}^+$  entry involves  $\beta$ -AR-mediated activation of  $\text{Ca}^{2+}$ /calmodulin-dependent protein kinase II (CAMKII).
- Selective pharmacological blockade as well as silencing of  $\text{Na}_v1.6$  inhibit myocyte arrhythmic potential and prevent arrhythmias *in vivo*.
