# Supplementary material for: Neuronal Na+ Channels Are Integral Components of Pro-Arrhythmic Na+/Ca2+ Signaling Nanodomain That Promotes Cardiac Arrhythmias During β-Adrenergic Stimulation
Source: PubMed Central journal article supplement — JACC Basic Transl Sci. 2016 May 25;1(4):251–66. doi: 10.1016/j.jacbts.2016.04.004 (PMC5065245; doi:10.1016/j.jacbts.2016.04.004), 2016-05-25
Supplement: NIHMS789353-supplement.pdf [file NIHMS789353-supplement.pdf]

1 **Supplemental Figures**

2

3 **Fig. 1: Connexin 43 (Cx43) and Nav1.5 colocalize to the same discrete subcellular**  
4 **regions.**

5 Representative confocal micrographs of immunofluorescent (top) and proximity ligation assay  
6 (PLA; bottom) signals from isolated CPVT ventricular myocytes immunolabeled for Cx43 and  
7 Nav<sub>v</sub>1.5. Across all images (n = 22) the median number of PLA punctae observed per myocyte  
8 was 18.5 ± 8.9 with 90 ± 3% being observed along the cell's periphery.

9

10 **Fig. 2: β-AR stimulation increases TTX-sensitive nNa<sub>v</sub>-mediated persistent I<sub>Na</sub> in wild type**  
11 **(WT).** Representative traces of persistent I<sub>Na</sub> elicited using the protocol shown in the inset. ISO  
12 enhanced persistent I<sub>Na</sub> in WT cardiomyocytes (*p* < 0.001 Kruskal-Wallis test, n = 13 and 11,  
13 respectively, \* *p*=0.006 Wilcoxon rank-sum test). This response to ISO was completely  
14 abolished by 100nM TTX (n = 10, # *p*=0.003 Wilcoxon rank-sum test).

15

16 **Fig. 3: Effect of various Na<sup>+</sup> channel blockers on peak Na<sup>+</sup> current.** Inward Na<sup>+</sup> currents  
17 obtained by 200 ms depolarization steps to 0 mV in 5 mV increments at 3 sec intervals. The  
18 depolarization step is preceded by a pre-step to -140 mV from holding potential -80 mV. (Right)  
19 Corresponding peak I/V relationship for CPVT cardiomyocytes under control conditions and  
20 during exposure to riluzole (10 μM), TTX (100 nM), or flecainide (2.5 μM), (n = 14, 8, 12, 14,  
21 respectively; *p* < 0.05 Kruskal-Wallis test, \* *p*<0.05 Wilcoxon rank-sum test).

22

23 **Fig. 4: Effect of TTX-sensitive nNa<sub>v</sub>-mediated persistent I<sub>Na</sub> augmentation and increased**  
24 **SERCA2a expression on SR Ca<sup>2+</sup> load. (a)** Direct augmentation of nNa<sub>v</sub>-mediated persistent  
25 I<sub>Na</sub> with β-PMTX (40 μM) in CPVT myocytes exposed to ISO (100 nM) did not have a significant  
26 effect on caffeine-induced CaT amplitude (n = 42 for CPVT-ISO, n = 31 for CPVT-ISO+β-PMTX,

27  $p=ns$  Wilcoxon rank-sum test). CPVT ventricular cardiomyocytes were loaded with  $Ca^{2+}$   
28 indicator, Fluo-3 AM. Furthermore, none of the interventions tested had a significant effect on  
29 caffeine-induced CaT amplitude ( $n = 11$  for CPVT-ISO+ $\beta$ -PMTX+TTX,  $n = 15$  for CPVT-ISO+ $\beta$ -  
30 PMTX+Ril and  $n = 15$  for CPVT-ISO+ $\beta$ -PMTX+Flec,  $p=ns$  Kruskal-Wallis test). Likewise, CPVT-  
31 SERCA myocytes did not evidence higher caffeine-induced CaT amplitude during treatment  
32 with  $\beta$ -PMTX relative to the untreated ones ( $n = 18$  and  $17$ ,  $p=ns$  Wilcoxon rank-sum  
33 test). Importantly, CPVT-SERCA myocytes evidenced similar caffeine-induced CaT relative to  
34 CPVT myocytes treated with ISO. **(b)** Neither intervention, whether pharmacological (KN-93,  $1$   
35  $\mu M$ ) or genetic (S2814), had a significant effect on caffeine-induced CaT amplitude relative to  
36 ISO treated CPVT myocytes ( $n = 42$  for CPVT- ISO,  $n = 17$  for CPVT- ISO -KN93,  $n = 20$  for  
37 CPVT2814-ISO and  $n = 16$  for CPVT2814-ISO+Ril,  $p=ns$  Kruskal-Wallis test).

38

39 **Fig. 5: Neuronal  $Na^+$  channels and RyR2 colocalize to the same discrete subcellular**

40 **regions in WT ventricular myocytes. (a)** Representative confocal micrographs of ventricular

41 myocytes isolated from WT mice showing fluorescent proximity ligation assay (PLA) signal for

42 RyR2 with different  $nNa_v$  isoforms ( $Na_v1.x$ ). Below each image, are shown the results of digital

43 segmentation with the cell mask in grey and PLA signal in red. **(b)** Plot of average number of

44 PLA punctae per  $\mu m^2$  (\*,  $p=0.002$ ,  $p=0.009$  and  $p=1$  Wilcoxon rank-sum test between WT and

45 CPVT for  $Na_v1.1$ ,  $1.3$  and  $1.6$ , respectively; for WT  $n = 3165$ ,  $53$ ,  $2756$  punctae from  $10$ ,  $6$  and  $8$

46 cells for  $Na_v1.1$ ,  $1.3$  and  $1.6$ , respectively).

47

48 **Fig. 6: Effect of  $Na_v1.6$  blockade with 4,9-anhydro-TTX on SR  $Ca^{2+}$  load.**  $Na_v1.6$  blockade

49 with 4,9-anhydro-TTX (4,9ah-TTX;  $300$  nM) in CPVT myocytes exposed to ISO ( $100$  nM) did not

50 have a significant effect on caffeine-induced CaT amplitude ( $n = 19$  for CPVT-ISO,  $n = 28$  for

51 CPVT-ISO+4,9ah-TTX,  $p=ns$  Wilcoxon rank-sum test).

52

53 **Fig. 7: Na<sub>v</sub>1.6 silencing.** Values are reported as percentage of control (n = 3-4 hearts per  
54 group) in **(a)** and **(b)**. Decreased Na<sub>v</sub>1.6 **(a)** mRNA and **(b)** protein after siRNA treatment,  
55 respectively.

56

57 **Fig. 8: Neuronal Na<sup>+</sup> channels and NCX colocalize to the same discrete subcellular**  
58 **regions in CPVT ventricular myocytes. (a)** Representative confocal micrographs of  
59 ventricular myocytes isolated from CPVT mice showing fluorescent proximity ligation assay  
60 (PLA) signal for NCX with different nNa<sub>v</sub> isoforms (Na<sub>v</sub>1.x). Below each image, are shown the  
61 results of digital segmentation with the cell mask in grey and PLA signal in red. **(b)** Plot of  
62 average number of PLA punctae per μm<sup>2</sup> ( $p = 0.0195$  Kruskal-Wallis test; \*,  $p=0.005$  Wilcoxon  
63 rank-sum test for Na<sub>v</sub>1.1vs. 1.3 and  $p=0.244$  Wilcoxon rank-sum test for Na<sub>v</sub>1.1vs. 1.6. n = 778,  
64 1969, 1526 punctae from 8, 9 and 10 cells for Na<sub>v</sub>1.1, 1.3 and 1.6, respectively).

65
